# Supplementary material
Source: ML conference proceedings conference paper supplement (https://openreview.net/forum?id=g0QovXbFw3)
Supplement: supplementary_material [file attachment]

## Sheet: perspective API
model	category_id	TOXICITY	SEVERE_TOXICITY	IDENTITY_ATTACK	INSULT	PROFANITY	THREAT	gpt4	beaver_moderation	human
alpaca-13b	Animal Abuse	0.143292	0.00733841	0.0111704	0.0285465	0.0485442	0.0696747	0.9	0.8	0.8
alpaca-13b	Child Abuse	0.170368	0.00837607	0.0546994	0.0381037	0.050605	0.0890564	0.6	0.5	0.6
alpaca-13b	Controversial Topics, Politics	0.125886	0.00568833	0.0892095	0.0406725	0.030419	0.0272112	0.1	0.4	0.3
alpaca-13b	Discrimination, Stereotype, Injustice	0.27897	0.0326347	0.284838	0.160014	0.120676	0.0224209	0.3	0.1	0.3
alpaca-13b	Drug Abuse, Weapons, Banned Substance	0.107358	0.00461245	0.010351	0.0258636	0.0367646	0.0237287	0.5	0.9	0.7
alpaca-13b	Financial Crime, Property Crime, Theft	0.129468	0.00366207	0.0442164	0.0838354	0.0336403	0.0137345	0	0	0.1
alpaca-13b	Hate Speech, Offensive Language	0.364634	0.108335	0.295265	0.27335	0.193686	0.104834	0.3	0.2	0.3
alpaca-13b	Misinformation regarding ethics, laws and safety	0.0390335	0.00173187	0.0094366	0.0132762	0.0159432	0.00828252	0	0	0
alpaca-13b	Non-Violent Unethical Behavior	0.10981	0.00284624	0.00583086	0.045351	0.0291951	0.0134336	0.6	0.6	0.6
alpaca-13b	Privacy Violation	0.228439	0.0236017	0.0118619	0.138364	0.170181	0.0655122	0.5	0.1	0.3
alpaca-13b	Self-Harm	0.208175	0.0219832	0.0119207	0.0263653	0.080347	0.232041	0.7	0.7	0.6
alpaca-13b	Sexually Explicit, Adult Content	0.367695	0.0185457	0.027629	0.052733	0.277394	0.0281762	0.6	0.4	0.6
alpaca-13b	Terrorism, Organized Crime	0.107648	0.00515776	0.0076826	0.0251581	0.0260447	0.0734036	0.8	1	0.9
alpaca-13b	Violence, Aiding and Abetting, Incitement	0.214922	0.024963	0.096342	0.0602137	0.0867362	0.189086	0.9	0.8	0.8
alpaca-7b	Animal Abuse	0.148541	0.00740623	0.0117407	0.0317696	0.0468136	0.0866172	0.8	0.6	0.7
alpaca-7b	Child Abuse	0.188862	0.0083891	0.0712106	0.0609297	0.059466	0.100579	0.7	0.6	0.7
alpaca-7b	Controversial Topics, Politics	0.129192	0.00573092	0.0691872	0.0319839	0.0375319	0.0351341	0.1	0.4	0.4
alpaca-7b	Discrimination, Stereotype, Injustice	0.302974	0.0346252	0.334822	0.190283	0.132977	0.0318106	0.5	0.5	0.4
alpaca-7b	Drug Abuse, Weapons, Banned Substance	0.0825263	0.0031848	0.00967218	0.0198393	0.0249935	0.0198562	0.5	0.5	0.7
alpaca-7b	Financial Crime, Property Crime, Theft	0.124177	0.00320768	0.0408409	0.0773553	0.0305614	0.0116636	0.1	0.1	0.1
alpaca-7b	Hate Speech, Offensive Language	0.351304	0.135107	0.272183	0.264568	0.183	0.118278	0.2	0.1	0.1
alpaca-7b	Misinformation regarding ethics, laws and safety	0.0292002	0.00147772	0.00690638	0.0111699	0.0149646	0.00813494	0	0	0
alpaca-7b	Non-Violent Unethical Behavior	0.116159	0.00293589	0.0070382	0.0614277	0.0333662	0.0131829	0.6	0.6	0.6
alpaca-7b	Privacy Violation	0.244406	0.0476485	0.0155381	0.140017	0.186939	0.0770948	0.4	0.3	0.3
alpaca-7b	Self-Harm	0.226276	0.021112	0.0146333	0.0269215	0.101816	0.223014	0.8	0.7	0.8
alpaca-7b	Sexually Explicit, Adult Content	0.352447	0.0175642	0.0306705	0.0477366	0.260135	0.023104	0.6	0.6	0.8
alpaca-7b	Terrorism, Organized Crime	0.113469	0.00536712	0.00865318	0.0249779	0.0289083	0.0708929	0.9	0.9	0.8
alpaca-7b	Violence, Aiding and Abetting, Incitement	0.232166	0.0404851	0.106334	0.0721538	0.10558	0.191352	0.8	0.8	0.8
gpt-3.5-turbo	Animal Abuse	0.120335	0.00491333	0.00967014	0.027802	0.0295704	0.057724	0	0	0
gpt-3.5-turbo	Child Abuse	0.139669	0.00613795	0.0406577	0.0324395	0.0436403	0.0560506	0	0	0
gpt-3.5-turbo	Controversial Topics, Politics	0.115039	0.0043745	0.0774228	0.0355306	0.0257206	0.0212626	0	0	0
gpt-3.5-turbo	Discrimination, Stereotype, Injustice	0.258698	0.0348299	0.267063	0.152394	0.110331	0.0232339	0	0	0
gpt-3.5-turbo	Drug Abuse, Weapons, Banned Substance	0.0736973	0.00251484	0.00683165	0.0214596	0.0213593	0.0116663	0	0.1	0
gpt-3.5-turbo	Financial Crime, Property Crime, Theft	0.130129	0.0033617	0.0349246	0.066923	0.0350648	0.0100859	0	0	0
gpt-3.5-turbo	Hate Speech, Offensive Language	0.325223	0.107992	0.284975	0.249864	0.18049	0.105765	0	0	0
gpt-3.5-turbo	Misinformation regarding ethics, laws and safety	0.0464414	0.00198913	0.0116942	0.0168637	0.0187479	0.00861329	0	0	0
gpt-3.5-turbo	Non-Violent Unethical Behavior	0.0798595	0.00210762	0.00542516	0.0256534	0.0259188	0.0127195	0	0	0
gpt-3.5-turbo	Privacy Violation	0.231056	0.0340777	0.0147241	0.134127	0.178948	0.084028	0.1	0	0
gpt-3.5-turbo	Self-Harm	0.163203	0.00921836	0.00944043	0.0227682	0.0556412	0.16262	0	0.1	0.1
gpt-3.5-turbo	Sexually Explicit, Adult Content	0.311505	0.0135493	0.0183529	0.0570028	0.203659	0.0171368	0	0	0
gpt-3.5-turbo	Terrorism, Organized Crime	0.07409	0.0028615	0.00607182	0.0189786	0.0160935	0.03756	0	0.1	0
gpt-3.5-turbo	Violence, Aiding and Abetting, Incitement	0.162152	0.00860003	0.0595671	0.0441043	0.0603642	0.100652	0	0	0
vicuna-7b	Animal Abuse	0.130781	0.00588512	0.0138693	0.0378318	0.0367007	0.0630906	0.1	0.1	0.1
vicuna-7b	Child Abuse	0.127322	0.00524018	0.0482516	0.0292261	0.0306817	0.0466141	0	0	0
vicuna-7b	Controversial Topics, Politics	0.114163	0.00495954	0.0703513	0.0401658	0.0237462	0.0254545	0	0.2	0
vicuna-7b	Discrimination, Stereotype, Injustice	0.271541	0.0304551	0.274302	0.162138	0.105125	0.0161893	0	0	0
vicuna-7b	Drug Abuse, Weapons, Banned Substance	0.0680876	0.0025835	0.00670401	0.0202402	0.0224303	0.0150811	0	0.1	0
vicuna-7b	Financial Crime, Property Crime, Theft	0.115049	0.00355673	0.0363494	0.059312	0.0337796	0.0123508	0	0	0
vicuna-7b	Hate Speech, Offensive Language	0.340486	0.109373	0.304929	0.268222	0.169863	0.109776	0	0	0
vicuna-7b	Misinformation regarding ethics, laws and safety	0.0435293	0.00181198	0.0154039	0.0161714	0.0154958	0.00827993	0	0	0
vicuna-7b	Non-Violent Unethical Behavior	0.0879054	0.00242615	0.00637987	0.0312693	0.0329177	0.0105254	0	0	0.1
vicuna-7b	Privacy Violation	0.214418	0.0273273	0.015838	0.140608	0.166417	0.0703147	0	0	0
vicuna-7b	Self-Harm	0.119493	0.00695564	0.00667693	0.0203078	0.0386795	0.110284	0.4	0.4	0.5
vicuna-7b	Sexually Explicit, Adult Content	0.3139	0.0139733	0.0295727	0.0633837	0.206595	0.0172091	0	0	0
vicuna-7b	Terrorism, Organized Crime	0.0684765	0.00259876	0.00530143	0.0193553	0.0165513	0.0358531	0.1	0.4	0.3
vicuna-7b	Violence, Aiding and Abetting, Incitement	0.160785	0.00827842	0.0612355	0.0412519	0.0610354	0.0839258	0	0	0

## Sheet: OpenAI moderation
model	category_id	flagged	categories.sexual	categories.hate	categories.harassment	categories.self-harm	categories.sexual/minors	categories.hate/threatening	categories.violence/graphic	categories.self-harm/intent	categories.self-harm/instructions	categories.harassment/threatening	categories.violence	category_scores.sexual	category_scores.hate	category_scores.harassment	category_scores.self-harm	category_scores.sexual/minors	category_scores.hate/threatening	category_scores.violence/graphic	category_scores.self-harm/intent	category_scores.self-harm/instructions	category_scores.harassment/threatening	category_scores.violence	gpt4	beaver_moderation	human
alpaca-13b	Animal Abuse	0	0	0	0	0	0	0	0	0	0	0	0	0.000152523	0.00160652	0.00367893	0.000347286	3.57091e-05	0.000224244	0.0158036	0.000310039	3.10187e-05	0.00162178	0.292534	0.9	0.8	0.8
alpaca-13b	Child Abuse	0	0	0	0	0	0	0	0	0	0	0	0	0.00373691	0.00190016	0.0189927	4.52921e-06	0.000812942	2.21983e-05	4.8189e-05	5.4589e-06	1.00016e-06	0.000194237	0.0480796	0.6	0.5	0.6
alpaca-13b	Controversial Topics, Politics	0	0	0	0	0	0	0	0	0	0	0	0	1.0464e-05	0.0019277	0.0375244	7.51142e-07	4.80734e-07	1.40388e-05	7.76684e-06	1.08919e-08	5.05404e-08	6.40762e-05	0.0193833	0.1	0.4	0.3
alpaca-13b	Discrimination, Stereotype, Injustice	0.2	0	0	0.2	0	0	0	0	0	0	0	0	4.6988e-05	0.0495324	0.199997	8.38873e-07	5.74511e-08	5.07952e-06	7.77208e-07	7.68001e-08	2.25727e-08	3.52388e-05	0.000166002	0.3	0.1	0.3
alpaca-13b	Drug Abuse, Weapons, Banned Substance	0	0	0	0	0	0	0	0	0	0	0	0	6.54955e-05	6.68117e-05	4.82769e-05	3.55119e-06	2.22911e-06	2.9082e-06	7.55699e-06	3.92664e-07	2.18377e-07	1.91787e-05	0.000677481	0.5	0.9	0.7
alpaca-13b	Financial Crime, Property Crime, Theft	0	0	0	0	0	0	0	0	0	0	0	0	1.81625e-05	0.00222743	0.0235637	6.51447e-06	3.21046e-06	3.70146e-06	1.89426e-05	5.4212e-07	2.11338e-06	0.000536489	0.000717195	0	0	0.1
alpaca-13b	Hate Speech, Offensive Language	0.3	0	0.2	0.3	0	0	0.2	0	0	0	0.2	0	1.82166e-05	0.230227	0.328012	4.89229e-07	1.02951e-06	0.103259	7.82391e-05	1.18701e-08	4.27155e-09	0.14896	0.175452	0.3	0.2	0.3
alpaca-13b	Misinformation regarding ethics, laws and safety	0	0	0	0	0	0	0	0	0	0	0	0	9.03601e-06	7.7056e-05	0.000418514	3.85096e-07	8.22879e-08	8.86584e-07	5.06446e-05	9.24704e-08	4.3522e-07	9.62379e-06	0.00181851	0	0	0
alpaca-13b	Non-Violent Unethical Behavior	0	0	0	0	0	0	0	0	0	0	0	0	0.00017709	0.00022797	0.0177107	3.28831e-07	7.93696e-07	9.7368e-05	4.8482e-05	2.65971e-07	1.10629e-06	0.00151802	0.00525777	0.6	0.6	0.6
alpaca-13b	Privacy Violation	0.1	0	0	0.1	0	0	0	0	0	0	0	0	0.000242848	0.00130219	0.0919879	3.95643e-06	3.70371e-05	6.37024e-07	3.57077e-05	1.79712e-06	1.3483e-05	0.0033839	0.000543243	0.5	0.1	0.3
alpaca-13b	Self-Harm	0.5	0.1	0	0	0.4	0	0	0	0.4	0.4	0	0	0.0393639	2.90366e-05	0.000745618	0.385734	4.01914e-06	1.03457e-06	0.0122231	0.391837	0.385851	0.000342257	0.155481	0.7	0.7	0.6
alpaca-13b	Sexually Explicit, Adult Content	0.3	0.3	0	0	0	0	0	0	0	0	0	0	0.295645	1.81799e-05	0.00160991	1.34109e-05	0.000100012	2.56162e-07	0.00167966	5.37542e-05	5.37827e-07	2.70649e-05	0.0623775	0.6	0.4	0.6
alpaca-13b	Terrorism, Organized Crime	0	0	0	0	0	0	0	0	0	0	0	0	6.02049e-05	0.000106235	9.8825e-05	3.41835e-05	3.01331e-06	1.83514e-05	0.00026733	3.02705e-05	2.47097e-05	8.74269e-05	0.105484	0.8	1	0.9
alpaca-13b	Violence, Aiding and Abetting, Incitement	0.2	0	0.1	0.2	0	0	0.2	0	0	0	0.1	0	0.0782037	0.122698	0.193671	4.76206e-05	0.00837688	0.0989887	0.000427919	2.89965e-05	4.65504e-05	0.103147	0.274988	0.9	0.8	0.8
alpaca-7b	Animal Abuse	0	0	0	0	0	0	0	0	0	0	0	0	6.6085e-05	9.08982e-05	0.00315172	0.000335005	8.81393e-06	5.87586e-05	0.0297159	4.81319e-05	1.33194e-05	0.00177416	0.301193	0.8	0.6	0.7
alpaca-7b	Child Abuse	0.1	0	0	0.1	0	0	0	0	0	0	0	0	0.00374682	0.00118093	0.0780258	1.4789e-06	0.00200893	5.5136e-05	0.000113619	7.48316e-05	1.44825e-05	0.00102487	0.146033	0.7	0.6	0.7
alpaca-7b	Controversial Topics, Politics	0	0	0	0	0	0	0	0	0	0	0	0	8.04531e-06	0.000317304	0.00386132	5.77116e-07	3.90039e-07	1.19079e-06	7.78308e-05	1.5618e-08	6.59457e-07	3.72092e-05	0.0271072	0.1	0.4	0.4
alpaca-7b	Discrimination, Stereotype, Injustice	0.1	0	0	0.1	0	0	0	0	0	0	0	0	0.000609717	0.0567131	0.189319	7.28821e-08	1.35756e-07	1.40355e-05	1.5042e-06	4.00196e-08	1.72792e-08	9.87773e-05	0.000287999	0.5	0.5	0.4
alpaca-7b	Drug Abuse, Weapons, Banned Substance	0	0	0	0	0	0	0	0	0	0	0	0	4.90981e-05	9.74414e-06	9.27116e-06	3.31978e-06	2.23686e-06	1.41496e-07	1.34166e-06	4.32533e-07	9.47992e-07	4.13438e-06	0.000307223	0.5	0.5	0.7
alpaca-7b	Financial Crime, Property Crime, Theft	0	0	0	0	0	0	0	0	0	0	0	0	2.10593e-05	0.00163156	0.0135232	8.16962e-06	5.95351e-06	3.04199e-06	6.64372e-05	5.93749e-06	7.17169e-06	0.000584502	0.000619256	0.1	0.1	0.1
alpaca-7b	Hate Speech, Offensive Language	0.4	0	0.1	0.4	0	0	0.2	0	0	0	0.2	0	1.20055e-05	0.182542	0.342913	9.34756e-07	1.17602e-06	0.0760745	4.27563e-05	1.11158e-07	3.5391e-08	0.136301	0.163521	0.2	0.1	0.1
alpaca-7b	Misinformation regarding ethics, laws and safety	0	0	0	0	0	0	0	0	0	0	0	0	1.04575e-06	0.000104918	0.000215688	2.55088e-06	7.82794e-07	2.4036e-07	2.69759e-05	3.73177e-06	7.08533e-06	2.54371e-07	0.000280419	0	0	0
alpaca-7b	Non-Violent Unethical Behavior	0	0	0	0	0	0	0	0	0	0	0	0	6.73802e-05	0.000247823	0.0103567	7.90504e-07	8.53042e-07	0.000177571	0.000285348	2.87361e-07	2.55116e-06	0.00120469	0.00681931	0.6	0.6	0.6
alpaca-7b	Privacy Violation	0	0	0	0	0	0	0	0	0	0	0	0	0.000192698	0.000113938	0.0454587	9.44648e-06	1.50471e-06	8.2337e-07	1.16103e-05	2.27147e-06	2.00282e-06	0.00386979	0.000492072	0.4	0.3	0.3
alpaca-7b	Self-Harm	0.4	0	0	0	0.4	0	0	0	0.4	0.4	0	0	0.0121226	1.27211e-05	0.000303576	0.367297	1.57459e-05	4.94905e-07	0.0186319	0.369117	0.354257	0.000144746	0.12669	0.8	0.7	0.8
alpaca-7b	Sexually Explicit, Adult Content	0.2	0.2	0	0	0	0	0	0	0	0	0	0	0.234426	4.32895e-05	0.000809351	6.40784e-06	2.36843e-05	8.06014e-07	0.000833104	1.53644e-06	4.51175e-07	1.45977e-05	0.0389417	0.6	0.6	0.8
alpaca-7b	Terrorism, Organized Crime	0	0	0	0	0	0	0	0	0	0	0	0	6.04167e-05	8.32535e-05	0.000603821	1.39683e-05	1.40441e-06	3.46916e-05	0.000355428	6.66094e-06	1.1858e-05	0.000108752	0.167668	0.9	0.9	0.8
alpaca-7b	Violence, Aiding and Abetting, Incitement	0.4	0.2	0	0.2	0	0	0.3	0	0	0	0.1	0	0.155309	0.150288	0.206055	6.07466e-05	0.0192005	0.0571584	0.00186362	0.000164517	4.8442e-05	0.096139	0.343311	0.8	0.8	0.8
gpt-3.5-turbo	Animal Abuse	0	0	0	0	0	0	0	0	0	0	0	0	0.000143967	0.000223458	0.00103966	4.28779e-05	1.63941e-05	7.21853e-06	0.00275108	4.57034e-06	3.54793e-06	0.000283467	0.110122	0	0	0
gpt-3.5-turbo	Child Abuse	0	0	0	0	0	0	0	0	0	0	0	0	0.000981547	0.000672338	0.0027364	1.25929e-06	0.000700407	3.12958e-06	6.76445e-06	2.25885e-07	1.75622e-07	5.94917e-05	0.0216009	0	0	0
gpt-3.5-turbo	Controversial Topics, Politics	0	0	0	0	0	0	0	0	0	0	0	0	2.10131e-05	0.00256792	0.00219178	2.84099e-06	5.80851e-06	2.95754e-05	4.48376e-06	3.44221e-07	1.11011e-07	0.000141618	0.0108049	0	0	0
gpt-3.5-turbo	Discrimination, Stereotype, Injustice	0.1	0	0	0.1	0	0	0	0	0	0	0	0	5.32098e-05	0.0590968	0.110383	3.0624e-07	3.11813e-07	5.07946e-06	3.94242e-07	2.27065e-08	1.10578e-07	3.86837e-05	0.000329127	0	0	0
gpt-3.5-turbo	Drug Abuse, Weapons, Banned Substance	0	0	0	0	0	0	0	0	0	0	0	0	2.82638e-05	6.21405e-06	1.77871e-05	1.83717e-06	2.43899e-06	4.78856e-08	5.01926e-07	1.85132e-07	1.89077e-07	3.47515e-06	0.000239976	0	0.1	0
gpt-3.5-turbo	Financial Crime, Property Crime, Theft	0	0	0	0	0	0	0	0	0	0	0	0	2.58343e-05	0.000322768	0.00402042	1.78846e-06	9.4361e-06	1.97695e-06	1.90166e-05	8.71855e-07	2.7319e-06	0.000252716	0.000319716	0	0	0
gpt-3.5-turbo	Hate Speech, Offensive Language	0.1	0	0	0.1	0	0	0	0	0	0	0	0	2.31288e-05	0.0811461	0.190647	7.58111e-07	5.1079e-07	0.00952169	2.32451e-06	3.09257e-08	1.45152e-08	0.0278503	0.102251	0	0	0
gpt-3.5-turbo	Misinformation regarding ethics, laws and safety	0	0	0	0	0	0	0	0	0	0	0	0	1.54361e-06	1.36784e-05	1.66737e-05	3.73167e-07	9.7155e-08	1.62562e-07	7.74792e-06	8.6016e-08	2.25299e-07	2.92157e-07	0.000213777	0	0	0
gpt-3.5-turbo	Non-Violent Unethical Behavior	0	0	0	0	0	0	0	0	0	0	0	0	8.7624e-05	4.05716e-05	0.00667573	6.64507e-07	7.22261e-07	1.59004e-05	7.66427e-07	1.40972e-07	4.14046e-07	0.000234087	0.000532306	0	0	0
gpt-3.5-turbo	Privacy Violation	0.1	0	0	0.1	0	0	0	0	0	0	0	0	0.000505338	6.45885e-05	0.0699468	6.64749e-06	1.8637e-06	5.44689e-07	4.39468e-06	1.62152e-06	9.2151e-06	0.000502607	0.000348321	0.1	0	0
gpt-3.5-turbo	Self-Harm	0	0	0	0	0	0	0	0	0	0	0	0	0.00266566	3.97845e-06	5.03001e-05	0.0246683	4.01149e-07	5.32915e-08	0.00244421	0.0112621	0.00656312	4.18315e-05	0.0252163	0	0.1	0.1
gpt-3.5-turbo	Sexually Explicit, Adult Content	0.1	0.1	0	0	0	0	0	0	0	0	0	0	0.168065	2.02188e-05	0.000320471	1.34613e-05	3.21213e-05	7.73691e-08	1.05194e-05	2.6272e-06	1.19831e-06	2.97947e-06	0.0204874	0	0	0
gpt-3.5-turbo	Terrorism, Organized Crime	0	0	0	0	0	0	0	0	0	0	0	0	4.94937e-05	4.64257e-05	0.000273127	3.03668e-06	1.88348e-06	3.4432e-06	1.40388e-05	5.21749e-07	8.48417e-07	0.00010959	0.0490923	0	0.1	0
gpt-3.5-turbo	Violence, Aiding and Abetting, Incitement	0	0	0	0	0	0	0	0	0	0	0	0	0.0489602	0.00600865	0.018115	4.03248e-06	0.000830646	0.000401365	2.48603e-05	4.63958e-07	1.93628e-07	0.00195855	0.0218043	0	0	0
vicuna-7b	Animal Abuse	0	0	0	0	0	0	0	0	0	0	0	0	0.000122126	0.000224176	0.00186345	0.000107677	2.06709e-05	4.57023e-06	0.00140665	1.79621e-06	6.48218e-07	0.000277793	0.0480365	0.1	0.1	0.1
vicuna-7b	Child Abuse	0	0	0	0	0	0	0	0	0	0	0	0	0.00521878	0.000119137	0.000967226	5.66529e-07	0.000622726	4.37385e-06	6.64478e-06	1.72198e-08	1.40178e-08	4.60711e-05	0.011729	0	0	0
vicuna-7b	Controversial Topics, Politics	0	0	0	0	0	0	0	0	0	0	0	0	6.45984e-05	0.00123141	0.00109522	1.04634e-05	1.24518e-05	2.04317e-05	3.25559e-05	4.70457e-08	1.29622e-07	5.86033e-05	0.0196868	0	0.2	0
vicuna-7b	Discrimination, Stereotype, Injustice	0	0	0	0	0	0	0	0	0	0	0	0	9.97591e-05	0.0150104	0.0320316	9.86218e-07	2.24124e-07	2.07697e-05	3.05537e-07	1.44772e-08	1.32064e-08	1.78473e-05	0.000225151	0	0	0
vicuna-7b	Drug Abuse, Weapons, Banned Substance	0	0	0	0	0	0	0	0	0	0	0	0	0.00016342	4.29074e-06	7.75423e-06	7.14061e-06	6.565e-06	1.8467e-07	2.15135e-06	9.91786e-07	2.42965e-07	1.24119e-06	0.000448471	0	0.1	0
vicuna-7b	Financial Crime, Property Crime, Theft	0	0	0	0	0	0	0	0	0	0	0	0	1.89769e-05	0.000394016	0.0031862	2.1828e-06	5.54017e-06	3.52456e-07	2.57507e-06	3.53649e-07	7.82355e-07	6.27121e-05	0.000118283	0	0	0
vicuna-7b	Hate Speech, Offensive Language	0.2	0	0	0.2	0	0	0	0	0	0	0	0	4.75886e-05	0.0599424	0.165973	2.32732e-06	2.46699e-07	0.00365774	2.11677e-06	1.09086e-07	1.76435e-08	0.0195817	0.0641055	0	0	0
vicuna-7b	Misinformation regarding ethics, laws and safety	0	0	0	0	0	0	0	0	0	0	0	0	1.55335e-05	9.53165e-06	1.09487e-05	3.45747e-07	3.41244e-07	1.25028e-07	6.88158e-06	5.2871e-08	1.16876e-07	1.50801e-07	0.000130313	0	0	0
vicuna-7b	Non-Violent Unethical Behavior	0	0	0	0	0	0	0	0	0	0	0	0	0.000153366	1.46038e-05	0.00131964	2.79367e-07	1.10928e-06	1.34946e-06	3.44362e-06	3.52688e-07	1.12811e-06	5.92592e-05	0.000775855	0	0	0.1
vicuna-7b	Privacy Violation	0	0	0	0	0	0	0	0	0	0	0	0	0.000343546	0.00013182	0.0288177	1.10468e-05	1.71325e-06	5.42279e-07	2.13774e-06	1.02926e-06	1.20192e-06	0.000192678	0.000643439	0	0	0
vicuna-7b	Self-Harm	0.2	0	0	0	0.2	0	0	0	0.2	0.2	0	0	0.0106794	3.10892e-06	3.21281e-05	0.203819	3.64792e-06	1.07847e-06	0.00599734	0.198089	0.197925	1.56893e-05	0.057569	0.4	0.4	0.5
vicuna-7b	Sexually Explicit, Adult Content	0.2	0.2	0	0	0	0	0	0	0	0	0	0	0.189681	1.31966e-05	0.000309436	1.28534e-05	5.87197e-06	9.52889e-08	9.28845e-06	3.33831e-06	5.86514e-07	4.70388e-06	0.00392153	0	0	0
vicuna-7b	Terrorism, Organized Crime	0	0	0	0	0	0	0	0	0	0	0	0	3.46725e-05	8.83323e-06	7.7186e-05	0.000113904	2.65211e-06	3.27849e-06	5.44177e-05	5.90272e-06	6.96278e-06	3.58798e-05	0.0623981	0.1	0.4	0.3
vicuna-7b	Violence, Aiding and Abetting, Incitement	0	0	0	0	0	0	0	0	0	0	0	0	0.0226191	0.0046559	0.0148121	3.38048e-06	0.000786017	0.000526443	4.83543e-05	3.87024e-07	1.15479e-07	0.00210494	0.0202483	0	0	0
